# Supplementary material for: Assembly and functionality of the ribosome with tethered subunits
Source: PubMed Central journal article supplement (PMC6389949; doi:10.1038/s41467-019-08892-w), 2019-02-25
Supplement: 41467_2019_8892_MOESM1_ESM.pdf [file 41467_2019_8892_MOESM1_ESM.pdf]

## **SUPPLEMENTARY INFORMATION**

### **Assembly and functionality of the ribosome with tethered subunits**

Nikolay A. Aleksashin, Margus Leppik, Adam J. Hockenberry, Dorota Klepacki, Nora Vázquez-Laslop, Michael C. Jewett, Jaanus Remme and Alexander S. Mankin

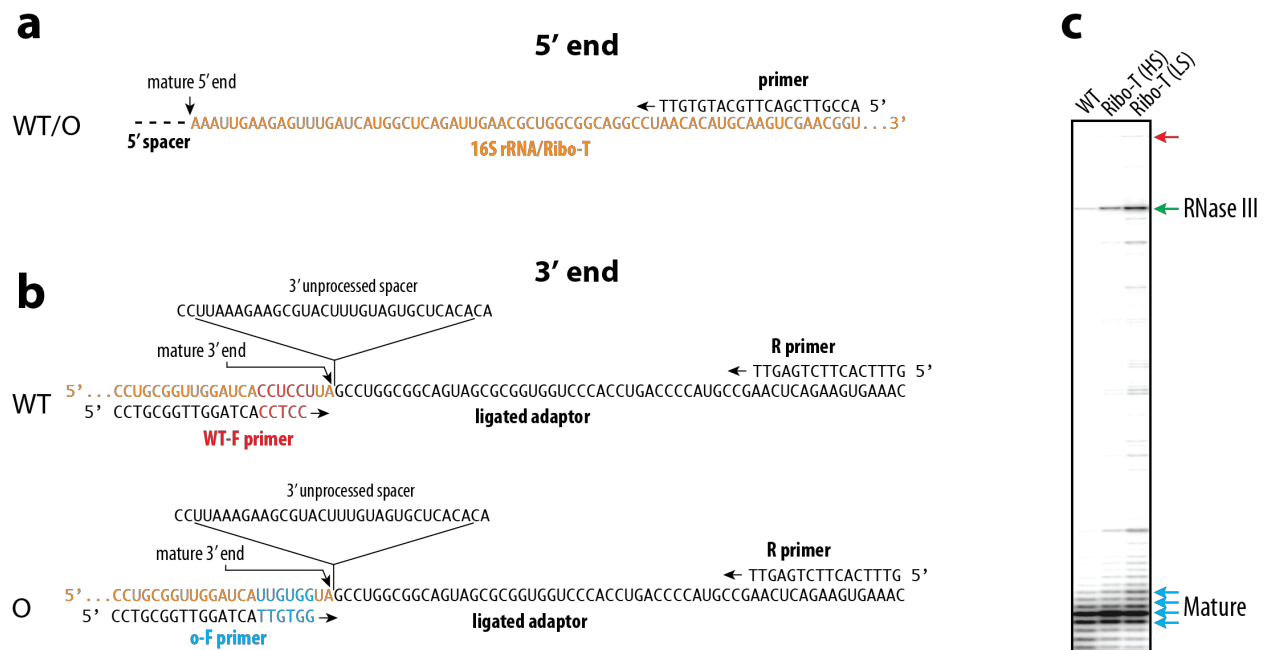

**Supplementary Figure 1. Analysis of the Ribo-T rRNA processing.** **a,b** The locations of the primers used for the analysis of the **(a)** 5' and **(b)** 3' rRNA processing. Mature rRNA sequences are shown in orange. In **(b)** wt SD sequence is shown in red and o-ASD sequence is indicated in cyan. **c** Primer extension analysis of the 5' end of the rRNA isolated from 70S ribosomes (wt), heavy shoulder (HS) or light shoulder (LS) of the Ribo-T peak obtained by sucrose gradient centrifugation (see **Fig. 2a** in the main text). The cDNA bands corresponding to the mature rRNA ends, to the product of RNase III cleavage and to rRNA uncleaved by RNase III are indicated by cyan, green and red arrows, respectively (see **Fig. 4a** in the main text).

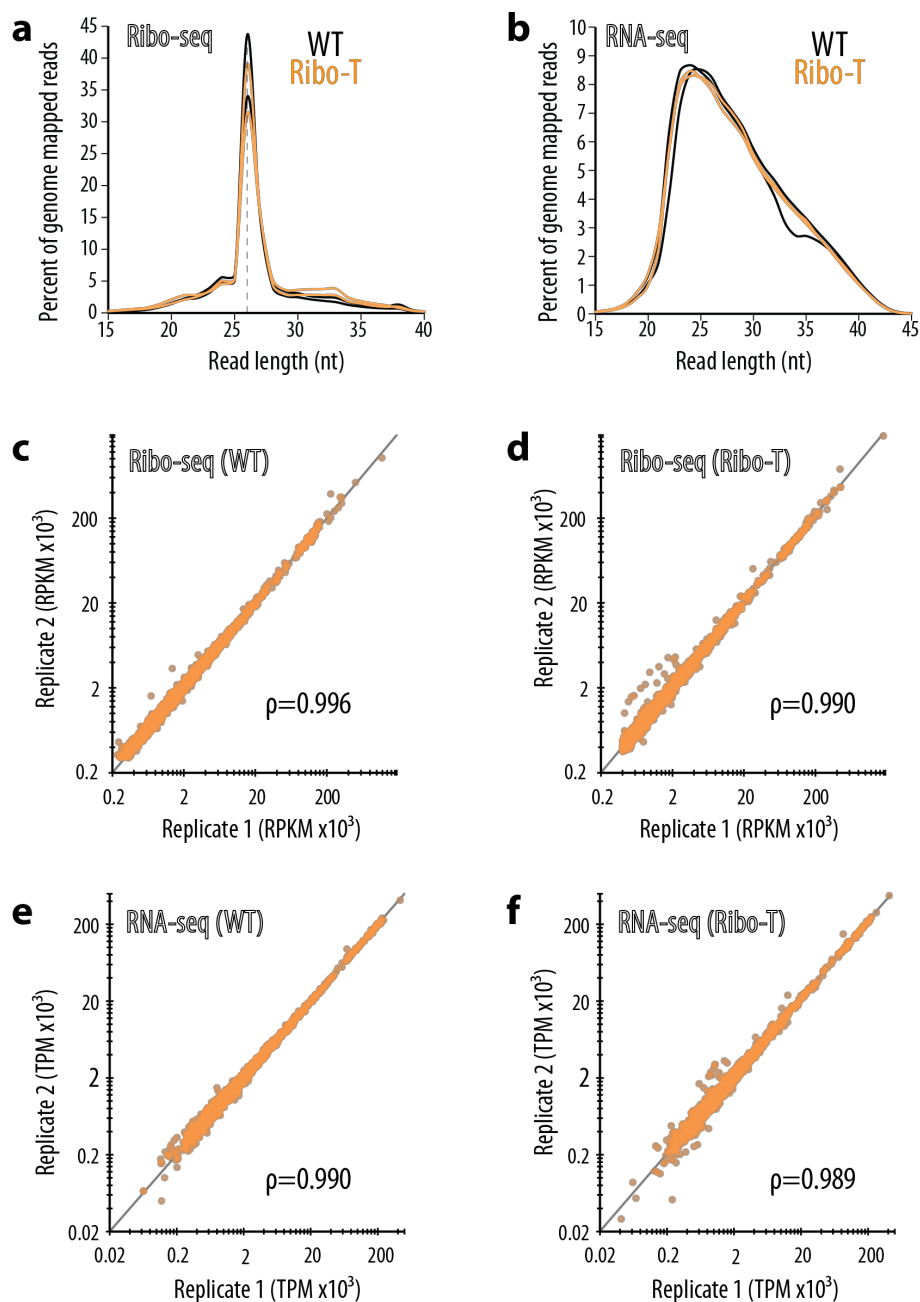

**Supplementary Figure 2. Read lengths and reproducibility of the Ribo-seq and RNA-seq experiments.** **a,b** Distribution of lengths of the reads in two Ribo-T samples (orange contours) and two control (wt) samples (black contours) in **(a)** Ribo-seq and **(b)** RNA-seq datasets. **c-f**, Reproducibility of the per-gene read counts comparing biological replicates in **(c,d)** Ribo-seq and **(e,f)** RNA-seq data. The Ribo-seq analysis was carried out on 1596 high-coverage genes. Spearman correlation coefficients are indicated.

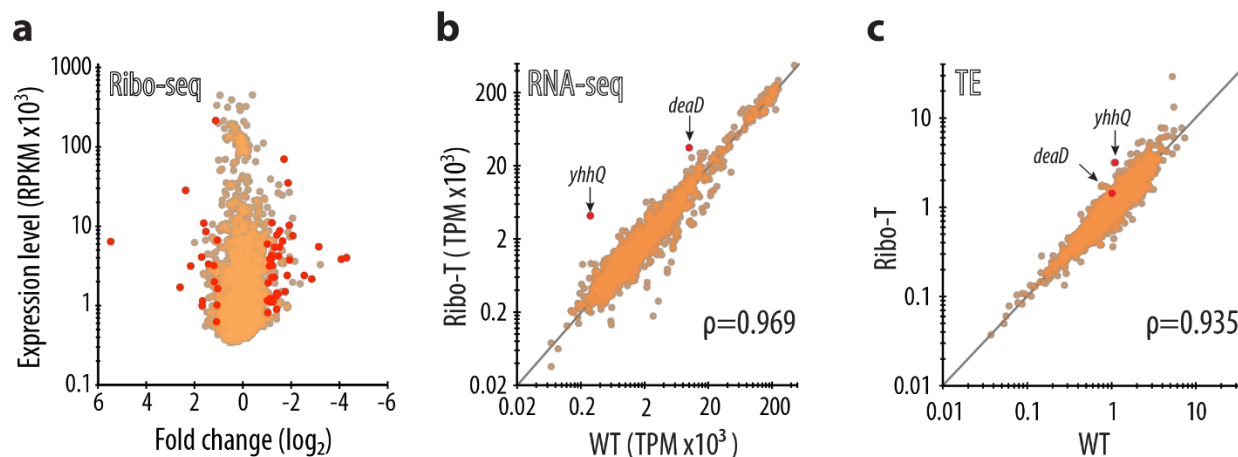

**Supplementary Figure 3. Comparison of the translome, transcriptome and translation efficiency in the Ribo-T and wt cells.** **a.** Changes in gene expression in Ribo-T cells in comparison with control (wt) cells deduced from Ribo-seq data. Each dot represents one of the 1596 high-coverage genes. Expression level was calculated as geometric mean of the number of reads (RPKM) mapped to the gene in four Ribo-seq samples (Ribo-T and wt, two biological replicates for each). Genes characterized with more than 2-fold difference in expression and called statistically significant (Student's t-test, FDR corrected  $p < 0.02$ ) are highlighted in red. **b.** Comparison of average mRNA-seq abundances (transcripts per million, TPM) in Ribo-T and control (wt) cells. **c.** Comparison of average translation efficiency calculated as a ratio between the Ribo-seq (RPKM) and RNA-seq (RPKM) abundances for each gene. In **a**, **b** and **c**, data are for 1596 high-coverage genes in the Ribo-seq samples. In **b** and **c**, example translation-related genes *yhhQ* and *deaD* are highlighted. Spearman correlation coefficients are indicated.

**Supplementary Table 1.** Number of reads in Ribo-seq and RNA-seq experiments.

| <b>Sample</b>      | <b>Sample type</b> | <b>N reads after barcode disambiguation</b> | <b>N reads mapped to the non-coding RNA genes</b> | <b>N reads mapped to the rest of the genome</b> |
|--------------------|--------------------|---------------------------------------------|---------------------------------------------------|-------------------------------------------------|
| WT replicate 1     | Ribo-seq           | 66,713,599                                  | 35,406,766                                        | 26,082,965                                      |
| WT replicate 2     | Ribo-seq           | 59,193,645                                  | 36,991,128                                        | 18,087,601                                      |
| Ribo-T replicate 1 | Ribo-seq           | 49,933,355                                  | 32,182,325                                        | 14,172,828                                      |
| Ribo-T replicate 2 | Ribo-seq           | 47,827,088                                  | 27,409,962                                        | 16,242,739                                      |
| WT replicate 1     | RNA-seq            | 30,252,124                                  | 23,016,726                                        | 5,440,005                                       |
| WT replicate 2     | RNA-seq            | 29,141,273                                  | 22,207,303                                        | 5,149,843                                       |
| Ribo-T replicate 1 | RNA-seq            | 31,566,411                                  | 21,492,111                                        | 7,615,602                                       |
| Ribo-T replicate 2 | RNA-seq            | 21,985,102                                  | 14,565,024                                        | 5,767,715                                       |

**Supplementary Table 2.** Genes with a more than two-fold change in expression level and called statistically significant (Student's T-test, FDR corrected  $p < 0.02$ ) in Ribo-T cells compared to wt control (from Ribo-seq data).

| Gene ID/name                | wt average RPKM | Ribo-T average RPKM | fold change Log <sub>2</sub> | p-value (FDR-corrected) |
|-----------------------------|-----------------|---------------------|------------------------------|-------------------------|
| <b>Up-regulated genes</b>   |                 |                     |                              |                         |
| b3471/yhhQ                  | 282.34          | 12543.24            | 5.47                         | 0.0126                  |
| b1112/bhsA                  | 482.61          | 2924.64             | 2.60                         | 0.0121                  |
| b3162/deaD                  | 9190.24         | 47489.00            | 2.37                         | 0.0190                  |
| b0607/uspG                  | 1153.11         | 5156.10             | 2.16                         | 0.0167                  |
| b3183/obgE                  | 1924.30         | 6280.85             | 1.71                         | 0.0144                  |
| b1376/uspF                  | 474.22          | 1524.50             | 1.68                         | 0.0167                  |
| b1635/gstA                  | 547.22          | 1741.28             | 1.67                         | 0.0144                  |
| b4314/fimA                  | 5377.90         | 16505.64            | 1.62                         | 0.0144                  |
| b1446/ydcY                  | 4408.59         | 12752.47            | 1.53                         | 0.0121                  |
| b4179/rnr                   | 1809.60         | 4848.16             | 1.42                         | 0.0159                  |
| b4595/yciY                  | 1941.32         | 4470.45             | 1.20                         | 0.0148                  |
| b2017/yefM                  | 1224.06         | 2775.32             | 1.18                         | 0.0144                  |
| b1089/rpmF                  | 134997.14       | 294455.66           | 1.13                         | 0.0165                  |
| b1708/nlpC                  | 400.35          | 852.12              | 1.09                         | 0.0154                  |
| b0199/metN                  | 657.87          | 1382.15             | 1.07                         | 0.0121                  |
| b2193/narP                  | 4305.79         | 9005.80             | 1.06                         | 0.0121                  |
| b1245/oppC                  | 1070.98         | 2203.08             | 1.04                         | 0.0121                  |
| <b>Down-regulated genes</b> |                 |                     |                              |                         |
| b3433/asd                   | 1549.93         | 768.56              | -1.01                        | 0.0121                  |
| b2551/glyA                  | 7997.66         | 3959.31             | -1.01                        | 0.0174                  |
| b4322/uxuA                  | 1093.78         | 535.66              | -1.03                        | 0.0121                  |
| b0720/gltA                  | 2609.78         | 1262.92             | -1.05                        | 0.0157                  |
| b2114/metG                  | 4304.76         | 2014.23             | -1.10                        | 0.0121                  |
| b3401/hslO                  | 5305.70         | 2458.33             | -1.11                        | 0.0121                  |
| b1914/uvrY                  | 1525.34         | 698.71              | -1.13                        | 0.0144                  |
| b0767/pgl                   | 1689.58         | 772.03              | -1.13                        | 0.0189                  |
| b2094/gatA                  | 4660.43         | 2069.19             | -1.17                        | 0.0121                  |

|            |           |          |       |        |
|------------|-----------|----------|-------|--------|
| b2597/raiA | 6016.73   | 2624.43  | -1.20 | 0.0167 |
| b1062/pyrC | 3149.30   | 1373.41  | -1.20 | 0.0121 |
| b0970/yccA | 5584.25   | 2425.26  | -1.20 | 0.0159 |
| b0411/tsx  | 15465.66  | 6711.11  | -1.20 | 0.0121 |
| b3616/tdh  | 4486.71   | 1919.23  | -1.23 | 0.0121 |
| b2143/cdd  | 1571.50   | 661.04   | -1.25 | 0.0165 |
| b4381/deoC | 3250.55   | 1315.52  | -1.31 | 0.0121 |
| b0154/hemL | 7774.69   | 3122.56  | -1.32 | 0.0144 |
| b3498/prlC | 1869.84   | 728.31   | -1.36 | 0.0121 |
| b0759/galE | 1306.73   | 495.26   | -1.40 | 0.0159 |
| b3408/feoA | 2087.32   | 787.05   | -1.41 | 0.0159 |
| b1101/ptsG | 11308.55  | 4246.11  | -1.41 | 0.0165 |
| b0945/pyrD | 2050.51   | 747.63   | -1.46 | 0.0165 |
| b0237/pepD | 6209.35   | 2229.16  | -1.48 | 0.0144 |
| b4025/pgi  | 8127.16   | 2825.15  | -1.52 | 0.0158 |
| b2096/gatY | 13012.65  | 4517.58  | -1.53 | 0.0121 |
| b3919/tpiA | 9884.99   | 3154.96  | -1.65 | 0.0121 |
| b1779/gapA | 107378.81 | 32943.23 | -1.70 | 0.0140 |
| b0459/maa  | 2314.94   | 688.29   | -1.75 | 0.0189 |
| b2091/gatD | 3753.96   | 1049.19  | -1.84 | 0.0176 |
| b3908/sodA | 55252.08  | 15098.26 | -1.87 | 0.0144 |
| b0032/carA | 16241.35  | 4291.88  | -1.92 | 0.0189 |
| b3617/kbl  | 5958.34   | 1558.35  | -1.93 | 0.0144 |
| b1817/manX | 12272.53  | 2928.00  | -2.07 | 0.0144 |
| b0150/fhuA | 4090.63   | 702.48   | -2.54 | 0.0144 |
| b4139/aspA | 3803.30   | 526.76   | -2.85 | 0.0154 |
| b1452/yncE | 9930.12   | 1123.01  | -3.14 | 0.0121 |
| b4244/pyrI | 7258.04   | 429.81   | -4.08 | 0.0144 |
| b4245/pyrB | 7656.84   | 390.48   | -4.29 | 0.0127 |

**Supplementary Table 3.** Plasmids used in this study.

| <b>Plasmid name</b>  | <b>Description</b>                                                              |
|----------------------|---------------------------------------------------------------------------------|
| pAM552 <sup>1</sup>  | Carries <i>E. coli rrnB</i> operon under control of the P <sub>L</sub> promoter |
| poAM552*             | Same as pAM552 but ASD (CCUCCU) in 16S rRNA is changed to oASD (UUGUGG)         |
| pRibo-T <sup>1</sup> | Carries Ribo-T operon under control of the P <sub>L</sub> promoter              |
| poRibo-T*            | Same as pRibo-T but ASD is changed to oASD                                      |

\* Provided by E. Carlson, Northwetsern University

**Supplementary references**

1. Orelle, C. et al. Protein synthesis by ribosomes with tethered subunits. *Nature* **524**, 119-124 (2015).
