# Supplementary material for: Assembly and functionality of the ribosome with tethered subunits
Source: PubMed Central journal article supplement (PMC6389949; doi:10.1038/s41467-019-08892-w), 2019-02-25
Supplement: 41467_2019_8892_MOESM3_ESM.pdf [file 41467_2019_8892_MOESM3_ESM.pdf]

**Title:** Supplementary Data 1

**Description:** Ribo-seq master file

**Title:** Supplementary Data 2

**Description:** RNA-seq master file
